# Supplementary material
Source: publisher site journal article supplement (https://www.dovepress.com/article/supplementary_file/594735/594735%20Supplementary%20Material.docx)
Supplement: Supplementary file 1 [file 594735%20Supplementary%20Material.docx]

**
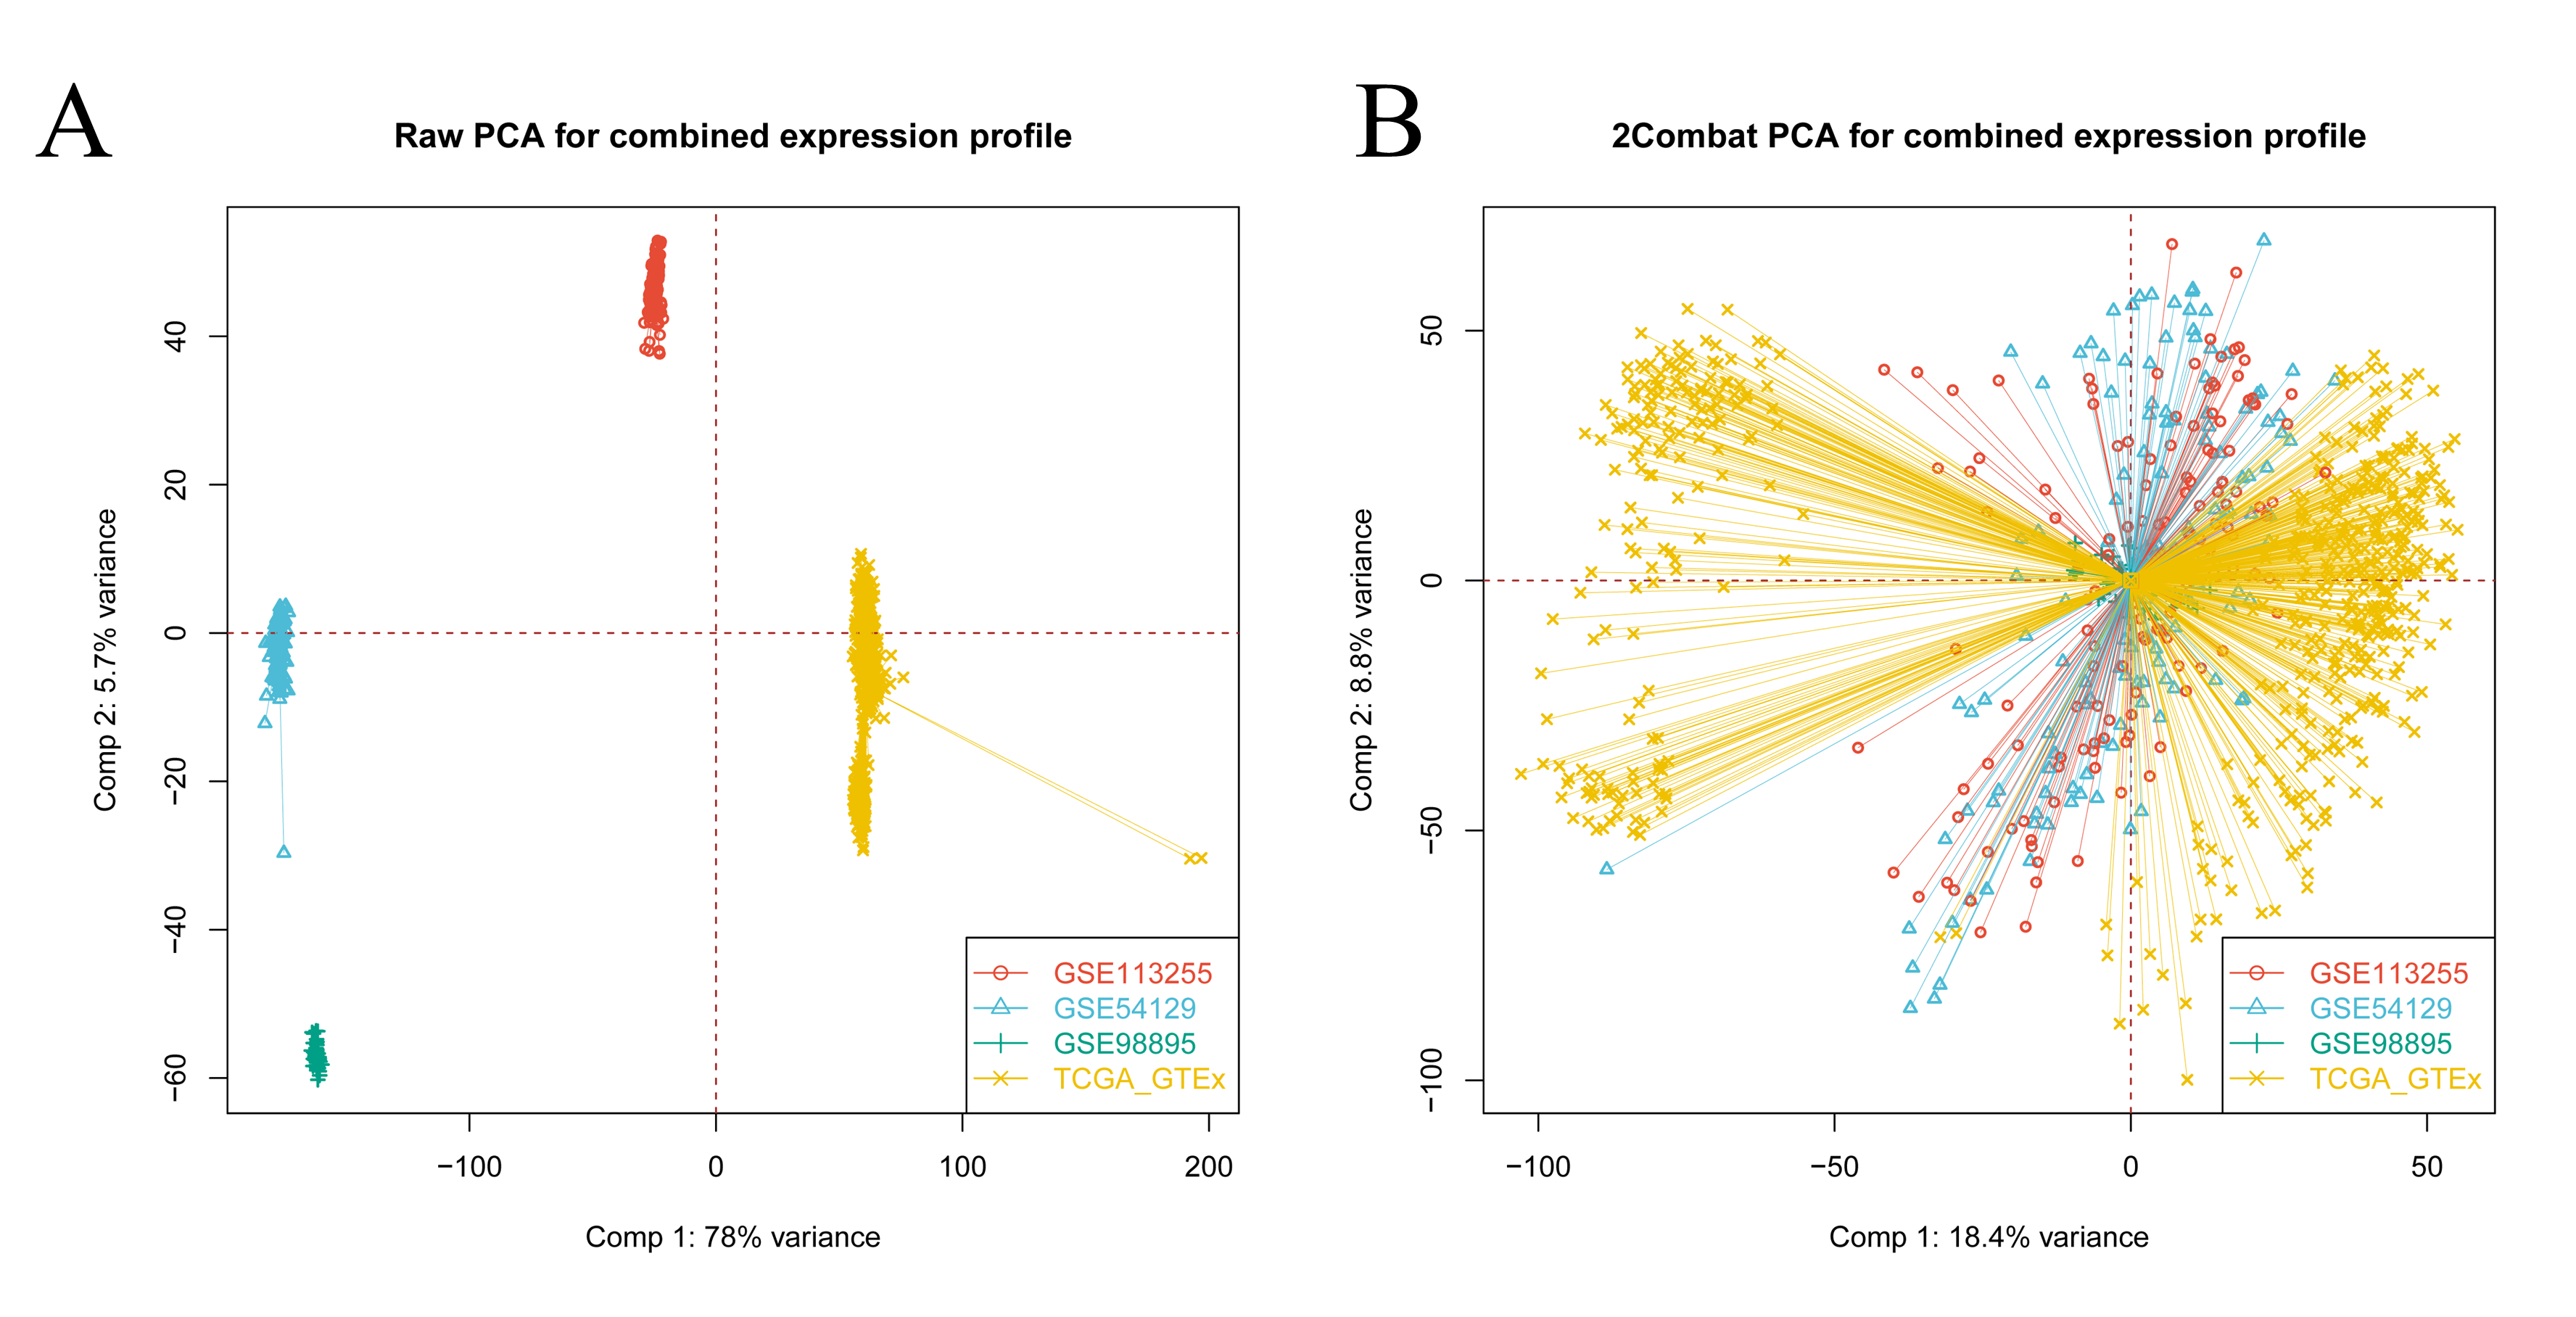
**

**Supplementary Figure 1**. Batch Effect Removal in Gastric Cancer and Metabolic Syndrome Cohorts

(A) PCA Plot Before Batch Effect Correction

(B) PCA Plot After Batch Effect Correction

**
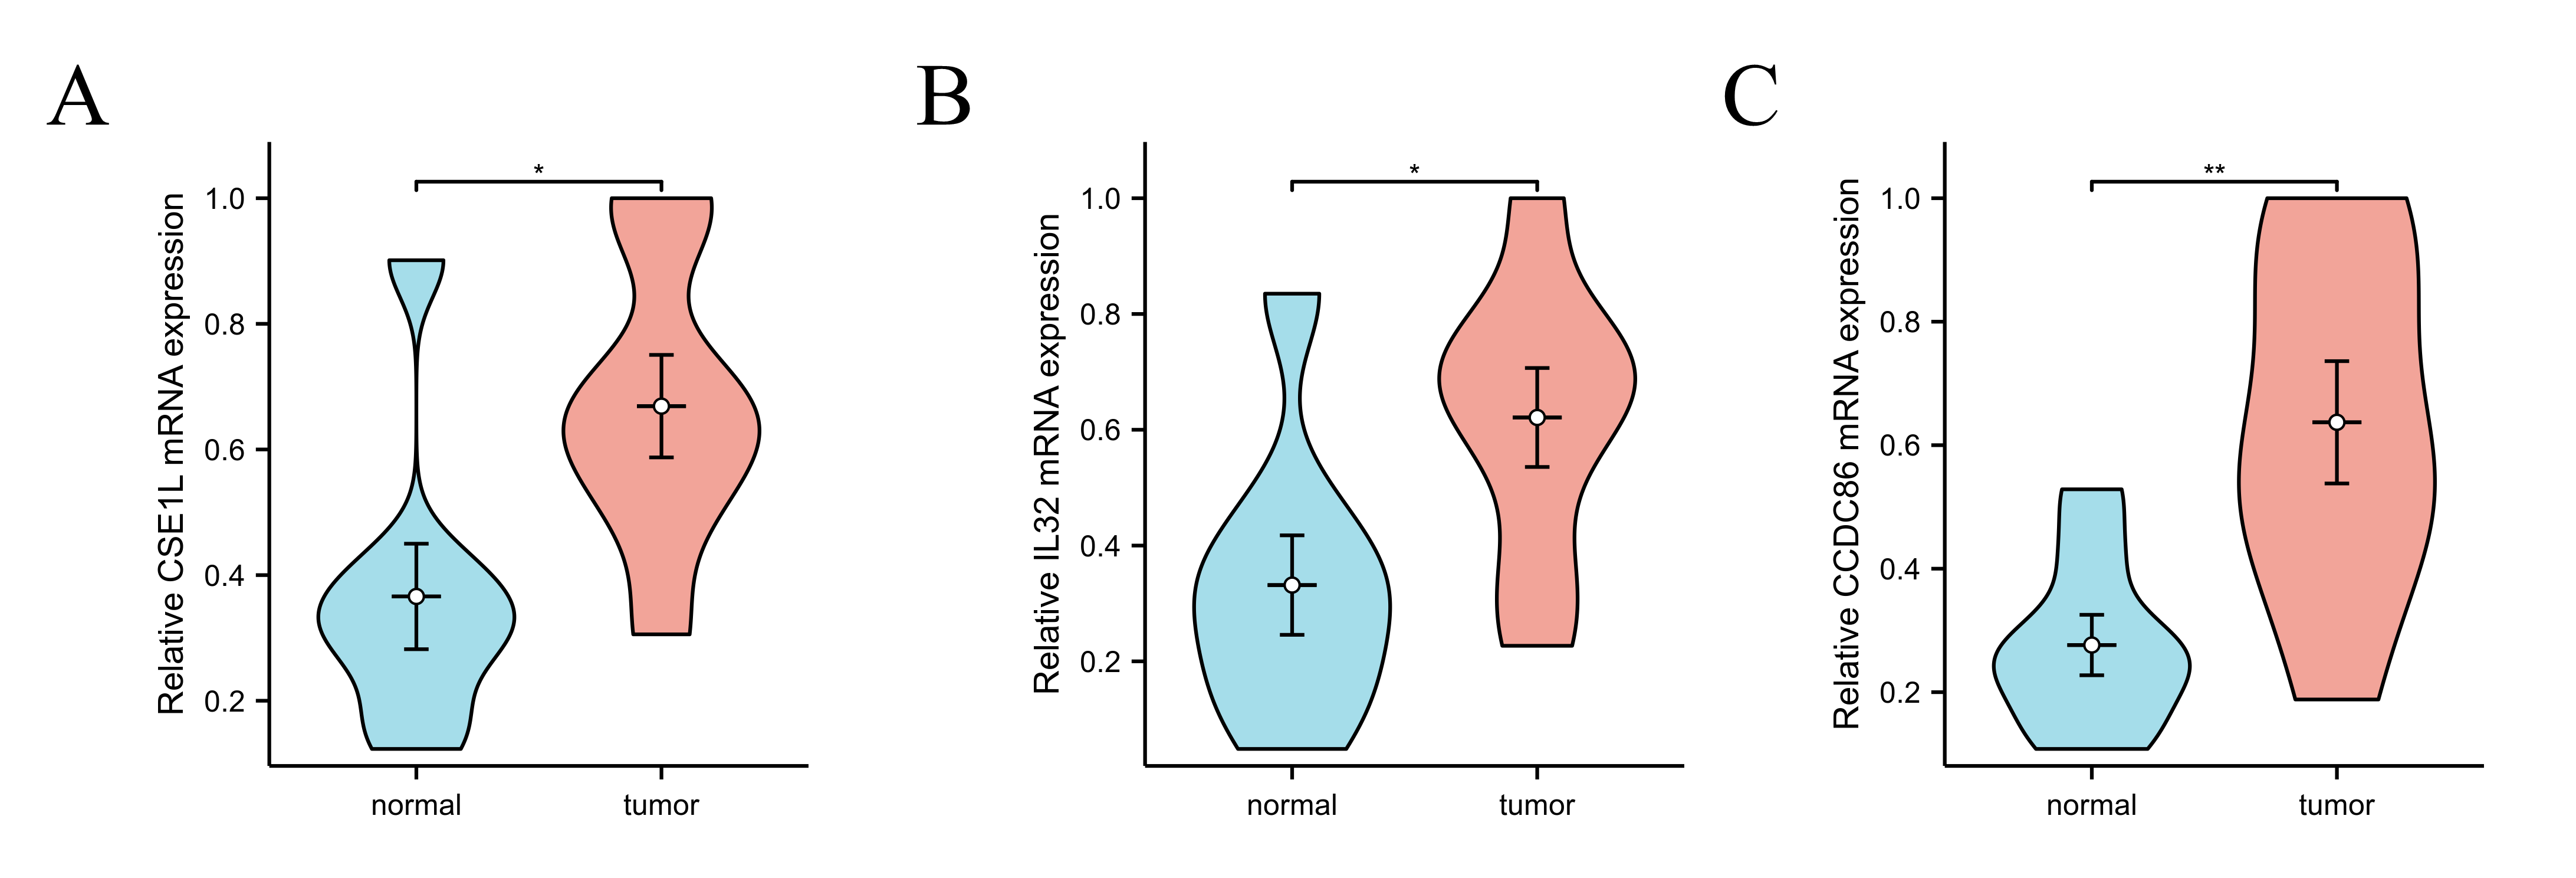
**

**Supplementary Figure 2**. qPCR Validation of Differential Expression of Hub Genes in Clinical Specimens.

Notes: *: P<0.05; **: P<0.01

**Supplementary Table 1**. Primer sequences for qPCR

CSE1L_F CAGAACACGCTGACAAGTATCT

CSE1L_R AGCCCTGCGTCTAGTATCAATA

IL32_F TGGCGGCTTATTATGAGGAGC

IL32_R CTCGGCACCGTAATCCATCTC

CCDC86_F GAGGAGGCACCAAAGTGTTCT

CCDC86_R AGCTCCAGTAGTGGCTGAGAG

GAPDH_F ACAACTTTGGTATCGTGGAAGG

GAPDH_R GCCATCACGCCACAGTTTC
